# Supplementary material for: Novel pathological predictive factors for extranodal extension in oral squamous cell carcinoma: a retrospective cohort study based on tumor budding, desmoplastic reaction, tumor-infiltrating lymphocytes, and depth of invasion
Source: BMC Cancer. 2022 Apr 13;22:402. doi: 10.1186/s12885-022-09393-8 (PMC9006434; doi:10.1186/s12885-022-09393-8)
Supplement: Supplementary file 4 — Additional file 4. Clinicopathological status of 83 biopsy specimens. The clinicopathological features were evaluated as follows; Sex (0: female; 1: male); cDOI 5 mm (0: ≤5 mm; 1:<5 mm); cDOI 10 mm (0: ≤10 mm; 1: DOI>10 mm); Metastasis (0: absence; 1: presence); Number of lymph node metastasis (0: n=0; 1: n=1; 2: n ≥2); Pattern of invasion (1: pattern of 1 and 2; 2: pattern of 3 and 4); LyV (0: absence; 1: presence); pT (0: pT1, 2; 1: pT3, 4); pN (0: no LN metastasis; 1: pN1; 2: pN2, and 3); ENE (0: absence; 1: presence); DR (0: DR-M; 1: DR-I); TB (0: TB-L; 1: TB-H); TILs (0: TILs-L; 1: TILs-H); TB-H/cDOI >10 mm (0: no; 1: yes); DR-I/TILs-L (0: no; 1: yes); DR-I/TILs-L/cDOI >10 mm (0: no; 1: yes).cDOI, clinical depth of invasion; pT, pathological T; pN, pathological N; ENE, extranodal extension; DR, desmoplastic reaction; TB, tumor budding; TILs, tumor-infiltrating lymphocytes; TB-H, high tumor budding; DR-I, immature desmoplastic reaction; TILs-L, low-grade tumor-infiltrating lymphocytes. [file 12885_2022_9393_MOESM4_ESM.xlsx]

## Sheet: Sheet1
Name	Case No.	Sex	Age	Anatomical site	cDOI 5 mm	cDOI 10 mm	Metastasis	Number of lymph nodes metastasis	pN	pT	ENE	DR (biopsy)	TB (biopsy)	TILs (biopsy)	TB-H/ cDOI >10 mm (biopsy)	DR-I/ TILs-L (biopsy)	DR-I/ TILs-L/ cDOI >10 mm (biopsy)	TB in ENE	DR in ENE	TILs in ENE
B1	SCC3	1	71	Tongue	1	1	1	2	1	1	0	0	1	0	1	0	0	－	－	－
B2	SCC7	1	61	Tongue	1	1	1	1	1	1	1	1	0	1	0	0	0	0	1	1
B3	SCC9	1	59	Tongue	1	1	1	2	1	1	0	1	1	1	1	0	0	－	－	－
B4	SCC10	0	75	Gingiva	1	0	1	1	1	0	0	0	0	1	0	0	0	－	－	－
B5	SCC11	1	77	Buccal mucosa	0	0	0	0	0	0	0	0	0	1	0	0	0	－	－	－
B6	SCC17	1	61	Tongue	1	1	0	0	0	1	0	1	1	0	1	1	1	－	－	－
B7	SCC18	0	71	Tongue	1	1	0	0	0	1	0	1	0	0	0	1	1	－	－	－
B8	SCC19	1	87	Buccal mucosa	1	1	1	2	2	1	1	1	0	0	0	1	1	0	1	0
B9	SCC20	1	81	Tongue	1	1	0	0	0	1	0	0	0	1	0	0	0	－	－	－
B10	SCC21	1	69	Tongue	1	0	0	0	0	1	0	1	1	1	1	0	0	－	－	－
B11	SCC27	0	69	Tongue	1	1	0	0	0	0	0	1	1	1	0	0	0	－	－	－
B12	SCC28	1	66	Buccal mucosa	0	0	0	0	0	0	0	0	0	1	0	0	0	－	－	－
B13	SCC29	1	59	Tongue	0	0	0	0	0	0	0	0	0	1	0	0	0	－	－	－
B14	SCC31	1	43	Plate	0	0	0	0	0	0	0	0	0	1	0	0	0	－	－	－
B15	SCC35	1	63	Tongue	1	0	1	2	1	0	0	1	0	0	0	1	0	－	－	－
B16	SCC37	0	70	Tongue	0	0	0	0	0	1	0	0	0	1	0	0	0	－	－	－
B17	SCC38	0	65	Tongue	1	0	0	0	0	0	0	0	0	1	0	0	0	－	－	－
B18	SCC41	0	79	Buccal mucosa	1	1	0	0	0	1	0	1	0	1	0	0	0	－	－	－
B19	SCC43	1	67	Tongue	1	0	0	0	0	0	0	0	0	1	0	0	0	－	－	－
B20	SCC45	1	65	Tongue	0	0	0	0	0	0	0	0	0	1	0	0	0	－	－	－
B21	SCC47	0	43	Tongue	0	0	0	0	0	0	0	0	0	1	0	0	0	－	－	－
B22	SCC48	0	84	Gingiva	1	1	0	0	0	1	0	1	1	0	1	1	1	－	－	－
B23	SCC49	1	74	Gingiva	0	0	0	0	0	1	0	1	0	0	0	1	0	－	－	－
B24	SCC50	0	56	Tongue	1	1	1	1	1	1	0	1	1	0	1	1	1	－	－	－
B25	SCC53	1	65	Tongue	1	1	1	2	2	1	1	1	1	0	1	1	1	1	1	0
B26	SCC54	0	73	Tongue	0	0	0	0	0	0	0	0	0	1	0	0	0	－	－	－
B27	SCC55	1	63	Tongue	1	1	1	1	1	1	0	1	0	0	0	1	1	－	－	－
B28	SCC56	1	73	Buccal mucosa	1	0	0	0	0	0	0	1	0	0	0	1	0	－	－	－
B29	SCC57	1	63	Tongue	1	1	1	1	1	1	1	1	1	0	1	1	1	1	1	0
B30	SCC58	0	56	Gingiva	1	1	1	2	1	1	0	0	0	1	0	0	0	－	－	－
B31	SCC61	1	64	Tongue	0	0	0	0	0	0	0	0	0	0	0	0	0	－	－	－
B32	SCC62	1	76	Tongue	1	1	0	0	0	1	0	1	1	0	1	1	0	－	－	－
B33	SCC64	1	79	Tongue	0	0	1	2	1	1	0	0	1	0	1	0	0	－	－	－
B34	SCC65	1	73	Buccal mucosa	0	0	0	0	0	0	0	0	0	0	0	0	0	－	－	－
B35	SCC66	0	57	Tongue	1	1	1	2	2	1	1	1	0	0	0	1	1	0	1	0
B36	SCC69	1	57	Tongue	1	1	1	2	1	1	0	1	0	0	0	1	1	－	－	－
B37	SCC72	1	66	Tongue	1	1	1	2	1	1	0	1	1	0	1	1	1	－	－	－
B38	SCC85	1	77	Tongue	1	1	1	2	1	1	0	1	0	1	0	0	0	－	－	－
B39	SCC88	1	67	Tongue	1	1	1	2	2	1	1	1	1	0	1	1	1	1	1	0
B40	SCC91	0	69	Tongue	1	1	1	2	1	1	0	1	0	1	0	0	0	－	－	－
B41	SCC92	0	85	Tongue	1	0	0	0	0	0	0	1	0	0	0	1	0	－	－	－
B42	SCC93	0	53	Tongue	0	0	0	0	0	0	0	0	0	1	0	0	0	－	－	－
B43	SCC96	1	65	Gingiva	1	1	0	0	0	1	0	1	0	0	0	1	1	－	－	－
B44	SCC97	0	74	Tongue	0	0	0	0	0	0	0	0	0	1	0	0	0	－	－	－
B45	SCC99	0	79	Tongue	1	0	0	0	0	0	0	1	0	1	0	0	0	－	－	－
B46	SCC101	0	79	Tongue	0	0	0	0	0	0	0	0	0	0	0	0	0	－	－	－
B47	SCC106	1	79	Tongue	0	0	0	0	0	0	0	0	0	1	0	0	0	－	－	－
B48	SCC107	0	75	Gingiva	1	1	0	0	0	1	0	1	1	0	1	1	1	－	－	－
B49	SCC108	0	71	Tongue	0	0	0	0	0	0	0	0	0	1	0	0	0	－	－	－
B50	SCC109	1	58	Tongue	0	0	0	0	0	0	0	0	0	0	0	0	0	－	－	－
B51	SCC110	1	51	Tongue	0	0	0	0	0	0	0	1	0	1	0	0	0	－	－	－
B52	SCC115	0	54	Tongue	1	0	1	1	1	0	0	1	0	0	0	1	0	－	－	－
B53	SCC118	1	80	Tongue	1	1	1	1	1	1	0	1	1	0	1	1	1	－	－	－
B54	SCC120	0	70	Tongue	1	0	0	0	0	0	0	1	0	1	0	0	0	－	－	－
B55	SCC121	1	80	Gingiva	0	0	0	0	0	0	0	0	0	1	0	0	0	－	－	－
B56	SCC125	1	64	Gingiva	1	1	0	0	0	1	0	1	0	0	0	1	1	－	－	－
B57	SCC126	1	39	Tongue	1	1	1	1	1	1	0	0	0	1	0	0	0	－	－	－
B58	SCC127	1	81	Tongue	0	0	0	0	0	0	0	0	0	0	0	0	0	－	－	－
B59	SCC130	0	78	Gingiva	0	0	0	0	0	0	0	0	0	1	0	0	0	－	－	－
B60	SCC131	1	81	Tongue	1	1	0	0	0	1	0	1	0	0	0	1	1	－	－	－
B61	SCC135	0	80	Tongue	1	1	1	1	1	1	0	1	1	0	1	1	1	－	－	－
B62	SCC136	1	81	Tongue	1	1	1	1	1	1	0	1	0	0	0	1	1	－	－	－
B63	SCC137	1	68	Tongue	1	1	0	0	0	1	0	0	0	1	0	0	0	－	－	－
B64	SCC142	1	71	Tongue	1	1	1	2	2	1	1	1	0	0	0	1	1	0	1	0
B65	SCC144	1	74	Tongue	1	0	0	0	0	0	0	0	0	1	0	0	0	－	－	－
B66	SCC147	1	58	Tongue	0	0	0	0	0	0	0	0	0	1	0	0	0	－	－	－
B67	SCC148	1	71	Tongue	0	0	0	0	0	0	0	0	0	1	0	0	0	－	－	－
B68	SCC153	0	76	Tongue	1	1	0	0	0	1	0	1	1	0	1	1	1	－	－	－
B69	SCC154	1	60	Tongue	1	1	0	0	0	1	0	0	0	1	0	0	0	－	－	－
B70	SCC156	0	46	Tongue	0	0	0	0	0	1	0	1	1	0	1	1	1	－	－	－
B71	SCC158	1	85	Buccal mucosa	0	0	0	0	0	0	0	1	0	1	0	0	0	－	－	－
B72	SCC159	0	62	Tongue	1	0	0	0	0	1	0	1	0	1	0	0	0	－	－	－
B73	SCC165	0	76	Tongue	1	0	0	0	0	1	0	1	0	1	0	0	0	－	－	－
B74	SCC168	0	45	Tongue	0	0	0	0	0	0	0	0	0	1	0	0	0	－	－	－
B75	SCC169	1	80	Gingiva	1	1	0	0	0	1	0	1	0	1	0	0	0	－	－	－
B76	SCC171	0	44	Gingiva	0	0	0	0	0	1	0	0	0	1	0	0	0	－	－	－
B77	SCC172	1	56	Tongue	1	1	1	2	2	1	1	0	1	0	0	1	0	1	1	0
B78	SCC178	1	91	Buccal mucosa	1	1	0	0	0	0	0	1	1	1	0	0	0	－	－	－
B79	SCC179	0	54	Tongue	1	1	0	0	0	1	0	1	0	0	0	1	1	－	－	－
B80	SCC180	1	76	Tongue	0	0	0	0	0	0	0	0	0	1	0	0	0	－	－	－
B81	SCC181	0	58	Gingiva	1	1	1	2	2	1	1	1	0	1	0	0	0	0	1	0
B82	SCC183	1	65	Gingiva	1	1	0	0	0	1	0	0	0	0	0	0	0	－	－	－
B83	SCC186	0	79	Gingiva	1	1	1	1	1	1	1	1	0	0	0	1	1	1	1	0
